# Supplementary material for: Calculating the serial interval of SARS-CoV-2 in Lebanon using 2020 contact-tracing data
Source: Springer Nature journal article supplement (doi:10.1186/s12879-021-06761-w), 2021-10-11

Additional file

**Figure S1. Empirical density distribution of the serial interval of the non-truncated data**

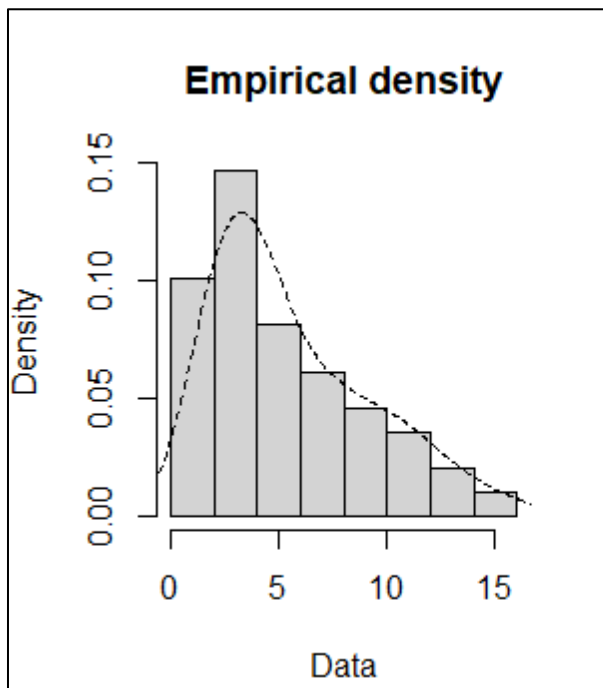

Supplement: MOESM1 [file 12879_2021_6761_MOESM1_ESM.pdf]
